# Supplementary material for: Southern rice black-streaked dwarf virus P8 protein facilitates viral infection by interacting with the C-terminal region of OsARF15
Source: Research Square preprint supplement (doi:10.21203/rs.3.rs-8736802/v1), 2026-02-20
Supplement: Supplementary file 1 [file c7a5b3f94eea3b7fd8b3e8bb.docx]

Supplementary Information for

**Southern rice black-streaked dwarf virus P8 protein facilitates viral infection by interacting with the C-terminal domain of OsARF15**

Xiaozai Liang 1✝ ; Hui-ting Xie 2✝; Jingyuan Wang2; Cui-ping Mo2; Jin-qing Chen2; Lihui Liu2; Bi-xia Qin2; Jian-he Cai2; Yaling Zhao1✱; Xiongbiao Xu1✱; Zhanbiao Li2✱

1College of Agriculture, Guangxi university/State Key Laboratory for Conservation and Utilization of Subtropical Agro-bioresources/Guangxi key Laboratory of Sugarcane biology, Nanning 530004, China.

2Plant Protection Research Institute，Guangxi Academy of Agricultural Sciences/Key Laboratory of Green Prevention and Control on Fruits and Vegetables in South China, Ministry of Agriculture and Rural Affairs/Guangxi Key Laboratory of Biology for Crop Diseases and Insect Pests, Nanning, Guangxi 530007, China.

✱Corresponding author:

Email: [lizhanbizo8410@sina.com](mailto:lizhanbizo8410@sina.com) (Zhanbiao Li); [xiongbiaox@gxu.edu.cn (Xiongbiao Xu)](mailto:xiongbiaox@gxu.edu.cn%20(XU%20Xiongbiao);) and [yalingzhao@gxu.edu.cn](mailto:yalingzhao@gxu.edu.cn) (Yaling Zhao).

✝ These authors contributed equally to this work.

This PDF file includes:

Supplementary text

Table S1

Table S1

| OsEF1α-F | ACATTGCCGTCAAGTTTGCTG |
| --- | --- |
| OsEF1α-R | AACAGCCACCGTTTGCCTC |
| RT-ARF15-F | AGTGATAGATGGACAGGTTACAG |
| RT-ARF15-R | CAAAGACTGGAGTGAATAGTTGG |
| AD-ARF15-F | gccatggaggccagtgaattcATGACCGGGATCGACCTCAAC |
| AD-ARF15-R | acgattcatctgcagctcgagGATCATCATATCCATAGTTGAAAT |
| BD-ARF15-F | atggccatggaggccgaattcATGACCGGGATCGACCTCAAC |
| BD-ARF15-R | ccgctgcaggtcgacggatccGATCATCATATCCATAGTTGAAAT |
| BD-ARF15-133-F | atggccatggaggccgaattcCAGCGGTTCGCGCGGATG |
| BD-ARF15-254-F | atggccatggaggccgaattcGCACTTTACAACCAGTGTTCTAATC |
| BD-ARF15-288-F | atggccatggaggccgaattcCAGTCCGAATTCATTGTACC |
| BD-ARF15-369-F | atggccatggaggccgaattcATTGAGCTGACTAGTTCAGTG |
| BD-ARF15-136-R | ccgctgcaggtcgacggatccCGCGAACCGCTGCTTCATG |
| BD-ARF15-260-R | ccgctgcaggtcgacggatccAGAACACTGGTTGTAAAGTGC |
| BD-ARF15-375-R | ccgctgcaggtcgacggatccCACTGAACTAGTCAGCTCAATC |
| OE-ARF15-pRHV-F | gatatccagatccagtgggatccATGACCGGGATCGACCTCAAC |
| OE-ARF15-pRHV-R | tgctccatagcggccgcactagtGATCATCATATCCATAGTTGAAAT |
| ARF15-GFP-F | cgtttttctgattaacagggatccATGACCGGGATCGACCTCAAC |
| ARF15-GFP-R | gtctctgaccctgaggatccGATCATCATATCCATAGTTGAAAT |
| pENTR-ARF15-F | ccgcggccgcccccttcaccATGACCGGGATCGACCTCAAC |
| pENTR-ARF15-R | gggtcggcgcgcccacccttGATCATCATATCCATAGTTGAAAT |
| pMBP-ARF15-F | tatcggaattaattcggatccATGACCGGGATCGACCTCAAC |
| pMBP-ARF15-R | gtggtggtggtggtgctcgagGATCATCATATCCATAGTTGAAAT |
| AD-P8-F | gccatggaggccagtgaattcATGATTGGCACCTATGATGAC |
| AD-P8-R | acgattcatctgcagctcgagTTAGCAAAGAATAGACACAGCTG |
| BD-P8-F | atggccatggaggccgaattcATGATTGGCACCTATGATGAC |
| BD-P8-R | ccgctgcaggtcgacggatccTTAGCAAAGAATAGACACAGCTG |
| GST-P8-F | ccgcgtggatccccggaattcATGATTGGCACCTATGATGAC |
| GST-P8-R | gtcacgatgcggccgctcgagTTAGCAAAGAATAGACACAGCTG |
| pENTR-P8-F | ccgcggccgcccccttcaccATGATTGGCACCTATGATGAC |
| pENTR-P8-R | gggtcggcgcgcccacccttTTAGCAAAGAATAGACACAGCTG |
